# Supplementary material
Source: Copernicus journal article supplement (doi:10.5194/egusphere-2026-2026)
Supplement: Supplementary file 1 [file egusphere-2026-2026-supplement.pdf]

Table S1. Characteristics of the sampling sites and their ring-width standard chronologies.

| <b>Regions</b>                                | <b>Sampling sites</b> | <b>Latitude (° N)</b> | <b>Longitude (° E)</b> | <b>Altitude (a.s.l. m)</b> | <b>CL</b> | <b>SN</b> | <b>Rbar</b> | <b>MS</b> | <b>SNR</b> | <b>SSS&gt;0.85</b> |
|-----------------------------------------------|-----------------------|-----------------------|------------------------|----------------------------|-----------|-----------|-------------|-----------|------------|--------------------|
| <b>RN:</b> Surrounding of Mt. Nurgong-Yabulai | BD04                  | 40.281                | 103.506                | 1466                       | 1844-2006 | 31        | 0.54        | 0.29      | 7.84       | 1941-2006          |
|                                               | ZX03                  | 40.199                | 104.795                | 1307                       | 1860-2015 | 39        | 0.59        | 0.34      | 14.17      | 1924-2015          |
|                                               | ZX04                  | 40.217                | 104.573                | 1382                       | 1918-2016 | 45        | 0.58        | 0.44      | 28.30      | 1941-2015          |
|                                               | ZX05                  | 40.485                | 104.263                | 1471                       | 1876-2015 | 47        | 0.63        | 0.42      | 34.25      | 1925-2015          |
|                                               | ZX06                  | 40.410                | 104.016                | 1479                       | 1901-2015 | 44        | 0.55        | 0.43      | 20.18      | 1937-2015          |
|                                               | ZX07                  | 39.890                | 104.640                | 1510                       | 1885-2015 | 38        | 0.51        | 0.4       | 19.52      | 1975-2015          |
|                                               | ZX08                  | 40.153                | 104.037                | 1400                       | 1894-2017 | 68        | 0.72        | 0.43      | 59.77      | 1914-2017          |
|                                               | ZX13                  | 39.772                | 103.573                | 1371                       | 1850-2017 | 46        | 0.49        | 0.39      | 16.38      | 1911-2017          |
| <b>RW:</b> Surrounding of Ulan Buh Desert     | ZXZN                  | 39.113                | 105.658                | 1299                       | 1903-2022 | 54        | 0.41        | 0.43      | 11.69      | 1967-2022          |
|                                               | ZXJL                  | 40.150                | 105.555                | 1280                       | 1886-2021 | 39        | 0.44        | 0.32      | 11.51      | 1996-2021          |
|                                               | ZXTM                  | 40.695                | 105.985                | 1343                       | 1941-2022 | 36        | 0.39        | 0.47      | 8.80       | 1985-2022          |
|                                               | ZXDK                  | 40.585                | 106.357                | 1036                       | 1892-2022 | 36        | 0.57        | 0.51      | 20.88      | 1969-2022          |
|                                               | ZXBL                  | 40.239                | 107.024                | 1076                       | 1958-2023 | 68        | 0.57        | 0.49      | 22.70      | 1978-2023          |
|                                               | ZXMX                  | 39.831                | 107.012                | 1416                       | 1942-2023 | 38        | 0.41        | 0.43      | 4.46       | 1974-2023          |
|                                               | ZX09                  | 39.531                | 106.530                | 1312                       | 1885-2017 | 45        | 0.45        | 0.48      | 11.44      | 1951-2017          |

|                                                       |      |        |         |      |           |    |      |      |       |           |
|-------------------------------------------------------|------|--------|---------|------|-----------|----|------|------|-------|-----------|
|                                                       | ZXBJ | 39.360 | 105.916 | 1215 | 1949-2022 | 38 | 0.47 | 0.41 | 11.33 | 1967-2022 |
| <b>RY:</b><br>Surrounding of<br>Badan Jaran<br>Desert | ZX14 | 39.419 | 102.483 | 1426 | 1912-2019 | 54 | 0.54 | 0.46 | 17.93 | 1943-2019 |
|                                                       | ZXMQ | 38.875 | 102.921 | 1545 | 1966-2022 | 64 | 0.50 | 0.53 | 21.41 | 1981-2022 |
|                                                       | BD01 | 39.774 | 101.399 | 1251 | 1856-2006 | 37 | 0.37 | 0.26 | 3.80  | 1946-2006 |
|                                                       | BD02 | 39.687 | 102.303 | 1424 | 1840-2006 | 41 | 0.42 | 0.22 | 2.98  | 1958-2006 |
|                                                       | BD03 | 40.458 | 102.261 | 1280 | 1891-2006 | 32 | 0.39 | 0.20 | 3.22  | 1945-2006 |
| <b>RT:</b> Surrounding<br>of Tengger Desert           | ZX01 | 38.209 | 105.226 | 1390 | 1917-2015 | 56 | 0.53 | 0.36 | 19.61 | 1934-2015 |
|                                                       | ZX02 | 37.933 | 105.267 | 1358 | 1911-2015 | 53 | 0.46 | 0.38 | 9.57  | 1959-2015 |
|                                                       | ZX10 | 37.618 | 104.563 | 1526 | 1919-2017 | 53 | 0.65 | 0.47 | 34.05 | 1944-2017 |
|                                                       | ZX11 | 37.730 | 105.155 | 1345 | 1971-2017 | 43 | 0.64 | 0.41 | 22.11 | 1973-2017 |
|                                                       | ZX12 | 37.885 | 104.649 | 1445 | 1889-2017 | 54 | 0.6  | 0.4  | 29.74 | 1921-2017 |

2 CL, chronology length; SN, the number of samples; Rbar, mean series intercorrelation; MS, mean sensitivity; SSS>0.85, the period of subsample  
3 signal strength (SSS) index >0.85; and SNR, signal-to-noise ratio.
